# Supplementary material for: Induction of hormesis in plants by urban trace metal pollution
Source: Springer Nature journal article supplement (doi:10.1038/s41598-021-99657-3), 2021-10-13
Supplement: MOESM1 [file 41598_2021_99657_MOESM1_ESM.pdf]

**Supplementary Table 1. Complete dataset related to Cd treatments.** Car: *Cardamine hirsuta*; poa: *Poa annua*; ste: *Stellaria media*. Met\_root: Cd concentration in roots (mg/kg DW); met\_shoot: Cd concentration in shoots (mg/kg DW); root\_dw: root dry weight (g) per plant; shoot\_dw: shoot dry weight (g) per plant; nodes: number of nodes per plant; chl\_a: chlorophyll *a* (mg/kg FW); chl\_b: chlorophyll *b* (mg/kg FW); carot: carotenoids (mg/kg FW); photo\_pigm: total photosynthetic pigments (chl\_a + chl\_b + carot) (mg/kg FW); leaf\_area: leaf area (cm<sup>2</sup>). Data are presented in 5 replicates (n=5).

| sample      | species | treatment | met_root | met_shoot | root_dw | shoot_dw | nodes | chl_a   | chl_b   | carot   | photo_pigm | leaf_area |
|-------------|---------|-----------|----------|-----------|---------|----------|-------|---------|---------|---------|------------|-----------|
| car_cd_0    | car     | Control   | 0        | 0         | 0.002   | 0.328    | 23    | 252.077 | 103.116 | 73.602  | 142.931    | 15.308    |
| car_cd_0    | car     | Control   | 0        | 0         | 0.006   | 0.411    | 25    | 274.02  | 124.776 | 82.367  | 160.388    | 17.579    |
| car_cd_0    | car     | Control   | 0        | 0         | 0.002   | 0.251    | 25    | 295.284 | 134.961 | 93.197  | 174.481    | 14.386    |
| car_cd_0    | car     | Control   | 0        | 0         | 0.002   | 0.205    | 20    | 263.545 | 108.344 | 79.746  | 150.545    | 16.59     |
| car_cd_0    | car     | Control   | 0        | 0         | 0.004   | 0.265    | 24    | 230.99  | 96.052  | 75.777  | 134.273    | 14.1      |
| car_cd_0.5  | car     | 0.5 uM    | 0        | 0         | 0.027   | 0.347    | 33    | 324.073 | 141.128 | 99.869  | 188.357    | 6.405     |
| car_cd_0.5  | car     | 0.5 uM    | 0        | 0         | 0.014   | 0.548    | 39    | 299.954 | 129.544 | 93.436  | 174.311    | 14.112    |
| car_cd_0.5  | car     | 0.5 uM    | 0        | 0         | 0.009   | 0.299    | 48    | 290.837 | 126.777 | 91.364  | 169.659    | 9.748     |
| car_cd_0.5  | car     | 0.5 uM    | 0        | 0         | 0.017   | 0.429    | 44    | 299.341 | 129.916 | 92.351  | 173.869    | 8.749     |
| car_cd_0.5  | car     | 0.5 uM    | 0        | 0         | 0.023   | 0.52     | 37    | 282.501 | 122.216 | 84.733  | 163.15     | 9.753     |
| car_cd_0.75 | car     | 0.75 uM   | 0.019    | 1.733     | 0.041   | 0.794    | 44    | 288.995 | 103.045 | 93.451  | 161.83     | 12.862    |
| car_cd_0.75 | car     | 0.75 uM   | 0.027    | 1.085     | 0.056   | 0.773    | 40    | 304.467 | 120.291 | 93.995  | 172.918    | 15.25     |
| car_cd_0.75 | car     | 0.75 uM   | 0.03     | 1.236     | 0.071   | 0.65     | 34    | 292.622 | 111.505 | 91.656  | 165.261    | 16.209    |
| car_cd_0.75 | car     | 0.75 uM   | 0.025    | 1.376     | 0.072   | 0.631    | 49    | 294.368 | 116.621 | 90.012  | 167        | 15.165    |
| car_cd_0.75 | car     | 0.75 uM   | 0.025    | 1.127     | 0.066   | 0.684    | 41    | 282.658 | 106.063 | 89.165  | 159.295    | 15.355    |
| car_cd_1    | car     | 1 uM      | 0.015    | 3.827     | 0.016   | 0.793    | 31    | 307.921 | 115.409 | 100.298 | 174.543    | 16.01     |
| car_cd_1    | car     | 1 uM      | 0.031    | 2.92      | 0.006   | 0.964    | 32    | 255.208 | 89.462  | 86.695  | 143.788    | 18.007    |
| car_cd_1    | car     | 1 uM      | 0.033    | 3.456     | 0.004   | 1.044    | 28    | 291.641 | 115.408 | 99.476  | 168.842    | 18.222    |
| car_cd_1    | car     | 1 uM      | 0.028    | 3.715     | 0.005   | 1.032    | 31    | 253.037 | 92.29   | 85.344  | 143.557    | 13.082    |
| car_cd_1    | car     | 1 uM      | 0.03     | 3.289     | 0.016   | 1.02     | 33    | 259.366 | 91.769  | 85.041  | 145.392    | 11.302    |
| car_cd_1.5  | car     | 1.5 uM    | 0.04     | 4.84      | 0.032   | 0.884    | 34    | 296.21  | 112.766 | 93.221  | 167.399    | 15.804    |
| car_cd_1.5  | car     | 1.5 uM    | 0.045    | 5.251     | 0.002   | 0.515    | 23    | 250.888 | 95.089  | 82.46   | 142.812    | 9.684     |
| car_cd_1.5  | car     | 1.5 uM    | 0.049    | 4.91      | 0.007   | 0.785    | 32    | 277.785 | 112.782 | 87.559  | 159.375    | 15.182    |
| car_cd_1.5  | car     | 1.5 uM    | 0.045    | 5.71      | 0.021   | 0.663    | 31    | 271.267 | 107.826 | 80.709  | 153.267    | 8.068     |
| car_cd_1.5  | car     | 1.5 uM    | 0.044    | 5.201     | 0.003   | 0.6      | 29    | 283.565 | 111.504 | 89.649  | 161.573    | 14.728    |
| car_cd_2    | car     | 2 uM      | 0.049    | 5.868     | 0.006   | 0.367    | 21    | 287.505 | 108.472 | 91.168  | 162.382    | 13.93     |

|            |     |         |        |        |       |       |    |         |         |         |         |        |
|------------|-----|---------|--------|--------|-------|-------|----|---------|---------|---------|---------|--------|
| car_cd_2   | car | 2 uM    | 0.044  | 5.789  | 0.003 | 0.318 | 15 | 258.35  | 98.851  | 81.833  | 146.344 | 7.747  |
| car_cd_2   | car | 2 uM    | 0.05   | 5.251  | 0     | 0.214 | 18 | 267.125 | 102.065 | 84.662  | 151.284 | 13.47  |
| car_cd_2   | car | 2 uM    | 0.037  | 5.427  | 0.002 | 0.415 | 25 | 270.911 | 110.489 | 85.213  | 155.538 | 16.292 |
| car_cd_2   | car | 2 uM    | 0.038  | 4.929  | 0.004 | 0.376 | 22 | 270.973 | 104.969 | 85.719  | 153.887 | 14.418 |
| poa_cd_0   | poa | Control | 0      | 0      | 0.022 | 0.348 | 7  | 307.341 | 123.438 | 92.189  | 174.323 | 2.366  |
| poa_cd_0   | poa | Control | 0      | 0      | 0.012 | 0.311 | 12 | 325.262 | 143.648 | 96.882  | 188.597 | 5.244  |
| poa_cd_0   | poa | Control | 0      | 0      | 0.02  | 0.243 | 11 | 332.138 | 143.207 | 95.787  | 190.377 | 4.205  |
| poa_cd_0   | poa | Control | 0      | 0      | 0.014 | 0.435 | 15 | 318.428 | 108.218 | 99.113  | 175.253 | 5.556  |
| poa_cd_0   | poa | Control | 0      | 0      | 0.041 | 0.404 | 14 | 332.838 | 131.1   | 103.248 | 189.062 | 6.018  |
| poa_cd_.5  | poa | 0.5 uM  | 1.916  | 1.015  | 0.055 | 0.843 | 29 | 280.209 | 97.473  | 88.107  | 155.263 | 4.504  |
| poa_cd_.5  | poa | 0.5 uM  | 2.627  | 1.244  | 0.071 | 0.473 | 20 | 283.958 | 98.023  | 89.691  | 157.224 | 4.978  |
| poa_cd_.5  | poa | 0.5 uM  | 1.31   | 0.899  | 0.06  | 0.697 | 24 | 257.404 | 83.657  | 81.919  | 140.993 | 4.797  |
| poa_cd_.5  | poa | 0.5 uM  | 2.146  | 0.724  | 0.059 | 1.065 | 27 | 297.809 | 107.429 | 90.924  | 165.387 | 7.257  |
| poa_cd_.5  | poa | 0.5 uM  | 1.898  | 1.057  | 0.083 | 0.65  | 19 | 265.098 | 87.223  | 85.294  | 145.872 | 5.353  |
| poa_cd_.75 | poa | 0.75 uM | 3.341  | 1.198  | 0.087 | 0.893 | 26 | 273.159 | 94.524  | 83.821  | 150.501 | 7.27   |
| poa_cd_.75 | poa | 0.75 uM | 3.221  | 1.422  | 0.117 | 0.914 | 27 | 271.921 | 93.257  | 85.076  | 150.085 | 5.15   |
| poa_cd_.75 | poa | 0.75 uM | 3.066  | 1.556  | 0.086 | 0.969 | 30 | 265.171 | 88.612  | 81.338  | 145.04  | 6.444  |
| poa_cd_.75 | poa | 0.75 uM | 3.212  | 1.709  | 0.136 | 1.108 | 25 | 241.95  | 71.45   | 77.662  | 130.354 | 6.146  |
| poa_cd_.75 | poa | 0.75 uM | 2.956  | 1.43   | 0.133 | 0.764 | 23 | 261.586 | 87.672  | 84.52   | 144.593 | 4.524  |
| poa_cd_1   | poa | 1 uM    | 6.422  | 5.024  | 0.045 | 0.685 | 24 | 281.423 | 100.099 | 87.51   | 156.344 | 6.49   |
| poa_cd_1   | poa | 1 uM    | 5.532  | 4.513  | 0.06  | 0.832 | 25 | 258.226 | 93.338  | 81.954  | 144.506 | 8.32   |
| poa_cd_1   | poa | 1 uM    | 5.667  | 3.861  | 0.032 | 0.995 | 27 | 254.975 | 87.748  | 79.598  | 140.774 | 6.787  |
| poa_cd_1   | poa | 1 uM    | 6.121  | 5.033  | 0.065 | 1.214 | 29 | 251.807 | 88.293  | 82.423  | 140.841 | 5.422  |
| poa_cd_1   | poa | 1 uM    | 5.744  | 4.103  | 0.105 | 0.713 | 24 | 300.539 | 111.2   | 95.819  | 169.186 | 6.499  |
| poa_cd_1.5 | poa | 1.5 uM  | 10.119 | 8.072  | 0.061 | 0.548 | 16 | 269.387 | 92.652  | 77.594  | 146.544 | 5.321  |
| poa_cd_1.5 | poa | 1.5 uM  | 9.698  | 7.417  | 0.045 | 0.81  | 21 | 222.07  | 69.598  | 70.624  | 120.764 | 4.985  |
| poa_cd_1.5 | poa | 1.5 uM  | 10.037 | 7.203  | 0.054 | 0.636 | 19 | 280.614 | 93.797  | 81.32   | 151.91  | 4.412  |
| poa_cd_1.5 | poa | 1.5 uM  | 9.976  | 6.796  | 0.042 | 0.881 | 21 | 270.055 | 89.33   | 83.483  | 147.623 | 5.982  |
| poa_cd_1.5 | poa | 1.5 uM  | 9.758  | 8.12   | 0.038 | 0.525 | 19 | 286.277 | 101.71  | 84.781  | 157.589 | 6.34   |
| poa_cd_2   | poa | 2 uM    | 21.434 | 13.902 | 0.014 | 0.278 | 9  | 304.741 | 112.615 | 91.254  | 169.537 | 4.567  |
| poa_cd_2   | poa | 2 uM    | 18.061 | 12.178 | 0.012 | 0.382 | 11 | 314.056 | 121.393 | 95.812  | 177.087 | 4.588  |
| poa_cd_2   | poa | 2 uM    | 19.03  | 13.967 | 0.024 | 0.405 | 12 | 304.049 | 112.711 | 89.507  | 168.756 | 4.587  |
| poa_cd_2   | poa | 2 uM    | 20.13  | 13.895 | 0.021 | 0.301 | 10 | 283.113 | 91.728  | 85.975  | 153.605 | 4.303  |

|            |     |         |        |        |       |       |    |         |         |        |         |       |
|------------|-----|---------|--------|--------|-------|-------|----|---------|---------|--------|---------|-------|
| poa_cd_2   | poa | 2 uM    | 17.185 | 14.806 | 0.02  | 0.387 | 13 | 284.975 | 101.576 | 83.766 | 156.772 | 5.406 |
| ste_cd_0   | ste | Control | 0      | 0      | 0.125 | 1.729 | 7  | 211.975 | 73.685  | 68.492 | 118.05  | 3.833 |
| ste_cd_0   | ste | Control | 0      | 0      | 0.157 | 1.712 | 10 | 196.002 | 67.777  | 67.777 | 110.519 | 5.934 |
| ste_cd_0   | ste | Control | 0      | 0      | 0.108 | 1.427 | 10 | 215.993 | 74.51   | 74.51  | 121.671 | 7.139 |
| ste_cd_0   | ste | Control | 0      | 0      | 0.123 | 1.467 | 10 | 214.323 | 74.712  | 64.809 | 117.948 | 5.467 |
| ste_cd_0   | ste | Control | 0      | 0      | 0.133 | 0.804 | 9  | 221.582 | 77.739  | 66.871 | 122.064 | 4.649 |
| ste_cd_.5  | ste | 0.5 uM  | 0.054  | 0      | 0.135 | 1.96  | 10 | 196.994 | 66.762  | 62.174 | 108.643 | 4.732 |
| ste_cd_.5  | ste | 0.5 uM  | 0.062  | 0      | 0.155 | 1.707 | 10 | 218.641 | 73.236  | 67.851 | 119.909 | 7.162 |
| ste_cd_.5  | ste | 0.5 uM  | 0.082  | 0      | 0.142 | 2.005 | 10 | 205.503 | 69.306  | 64.537 | 113.115 | 4.614 |
| ste_cd_.5  | ste | 0.5 uM  | 0.07   | 0      | 0.152 | 0.958 | 8  | 209.869 | 73.336  | 64.969 | 116.058 | 2.454 |
| ste_cd_.5  | ste | 0.5 uM  | 0.07   | 0      | 0.145 | 1.906 | 9  | 190.851 | 68.39   | 60.234 | 106.492 | 5.438 |
| ste_cd_.75 | ste | 0.75 uM | 0.085  | 1.674  | 0.101 | 0.517 | 9  | 222.643 | 75.809  | 69.963 | 122.805 | 3.303 |
| ste_cd_.75 | ste | 0.75 uM | 0.059  | 1.787  | 0.07  | 1.547 | 11 | 215.09  | 72.64   | 67.448 | 118.393 | 3.794 |
| ste_cd_.75 | ste | 0.75 uM | 0.062  | 1.718  | 0.105 | 1.219 | 10 | 217.043 | 72.138  | 69.709 | 119.63  | 3.467 |
| ste_cd_.75 | ste | 0.75 uM | 0.073  | 1.75   | 0.068 | 2.315 | 10 | 217.346 | 74.203  | 72.08  | 121.21  | 4.05  |
| ste_cd_.75 | ste | 0.75 uM | 0.062  | 1.744  | 0.073 | 1.675 | 11 | 194.698 | 64.801  | 63.252 | 107.584 | 4.107 |
| ste_cd_1   | ste | 1 uM    | 44.147 | 2.259  | 0.171 | 1.599 | 11 | 208.329 | 69.125  | 64.793 | 114.082 | 7.727 |
| ste_cd_1   | ste | 1 uM    | 31.078 | 3.007  | 0.18  | 2.55  | 12 | 229.849 | 78.939  | 72.31  | 127.033 | 5.21  |
| ste_cd_1   | ste | 1 uM    | 29.083 | 2.934  | 0.166 | 0.782 | 9  | 219.974 | 77.356  | 65.802 | 121.044 | 4.096 |
| ste_cd_1   | ste | 1 uM    | 36.766 | 2.767  | 0.123 | 1.019 | 10 | 191.819 | 63.536  | 59.837 | 105.064 | 4.821 |
| ste_cd_1   | ste | 1 uM    | 29.41  | 2.888  | 0.194 | 2.045 | 10 | 211.79  | 71.094  | 64.118 | 115.667 | 5.236 |
| ste_cd_1.5 | ste | 1.5 uM  | 51.149 | 2.996  | 0.122 | 0.932 | 9  | 263.183 | 104.646 | 80.11  | 149.313 | 1.911 |
| ste_cd_1.5 | ste | 1.5 uM  | 54.31  | 2.208  | 0.101 | 1.485 | 11 | 247.637 | 91.981  | 76.45  | 138.689 | 3.986 |
| ste_cd_1.5 | ste | 1.5 uM  | 49.384 | 3.626  | 0.096 | 0.788 | 9  | 280.441 | 115.767 | 85.656 | 160.621 | 3.59  |
| ste_cd_1.5 | ste | 1.5 uM  | 52.508 | 3.082  | 0.114 | 1.289 | 11 | 212.796 | 68.839  | 65.863 | 115.833 | 5.743 |
| ste_cd_1.5 | ste | 1.5 uM  | 47.642 | 2.914  | 0.115 | 1.951 | 11 | 160.881 | 50.111  | 50.399 | 87.13   | 4.424 |
| ste_cd_2   | ste | 2 uM    | 61.628 | 4.55   | 0.015 | 0.658 | 9  | 276.649 | 102.264 | 82.635 | 153.849 | 5.083 |
| ste_cd_2   | ste | 2 uM    | 69.744 | 4.665  | 0.077 | 0.71  | 9  | 237.815 | 83.742  | 72.636 | 131.398 | 4.724 |
| ste_cd_2   | ste | 2 uM    | 71.505 | 4.252  | 0.039 | 0.808 | 11 | 253.706 | 92.041  | 74.968 | 140.238 | 5.675 |
| ste_cd_2   | ste | 2 uM    | 71.009 | 4.879  | 0.043 | 1.275 | 10 | 257.563 | 92.47   | 77.214 | 142.416 | 6.494 |
| ste_cd_2   | ste | 2 uM    | 65.561 | 4.226  | 0.083 | 0.869 | 11 | 231.316 | 80.787  | 70.313 | 127.472 | 5.494 |

**Supplementary Table 2. Complete dataset related to Cr treatments.** Car: *Cardamine hirsuta*; poa: *Poa annua*; ste: *Stellaria media*. Met\_root: Cd concentration in roots (mg/kg DW); met\_shoot: Cd concentration in shoots (mg/kg DW); root\_dw: root dry weight (g) per plant; shoot\_dw: shoot dry weight (g) per plant; nodes: number of nodes per plant; chl\_a: chlorophyll *a* (mg/kg FW); chl\_b: chlorophyll *b* (mg/kg FW); carot: carotenoids (mg/kg FW); photo\_pigm: total photosynthetic pigments (chl\_a + chl\_b + carot) ( $\mu\text{g/kg FW}$ ); leaf\_area: leaf area ( $\text{cm}^2$ ). Data are presented in 5 replicates (n=5).

| sample     | species | treatment | met_root | met_shoot | root_dw | shoot_dw | nodes | chl_a   | chl_b   | carot  | photo_pigm | leaf_area |
|------------|---------|-----------|----------|-----------|---------|----------|-------|---------|---------|--------|------------|-----------|
| car_cr_0   | car     | Control   | 0.07     | 3.67      | 0       | 0.019    | 11    | 212.561 | 86.138  | 68.59  | 122.429    | 0.331     |
| car_cr_0   | car     | Control   | 0.077    | 3.08      | 0       | 0.018    | 10    | 265.835 | 110.083 | 76.598 | 150.839    | 0.426     |
| car_cr_0   | car     | Control   | 0.075    | 4.45      | 0       | 0.012    | 7     | 215.87  | 81.343  | 59.789 | 119.001    | 0.437     |
| car_cr_0   | car     | Control   | 0.074    | 3.73      | 0.002   | 0.091    | 12    | 246.946 | 97.696  | 76.071 | 140.237    | 0.843     |
| car_cr_0   | car     | Control   | 0.078    | 3.97      | 0.003   | 0.083    | 14    | 247.065 | 101.323 | 69.126 | 139.171    | 0.749     |
| car_cr_5   | car     | 5 uM      | 0.63     | 3.69      | 0.009   | 0.114    | 14    | 187.892 | 72.898  | 62.055 | 107.615    | 0.509     |
| car_cr_5   | car     | 5 uM      | 0.687    | 3.42      | 0.011   | 0.089    | 12    | 192.316 | 74.142  | 63.461 | 109.973    | 0.652     |
| car_cr_5   | car     | 5 uM      | 0.872    | 4.28      | 0.011   | 0.101    | 15    | 269.743 | 101.349 | 74.592 | 148.562    | 0.798     |
| car_cr_5   | car     | 5 uM      | 0.73     | 3.8       | 0.009   | 0.129    | 20    | 244.071 | 98.482  | 72.436 | 138.33     | 1.028     |
| car_cr_5   | car     | 5 uM      | 0.767    | 3.86      | 0.015   | 0.112    | 22    | 274.701 | 112.592 | 79.426 | 155.573    | 0.847     |
| car_cr_10  | car     | 10 uM     | 1.863    | 1.99      | 0.024   | 0.211    | 28    | 281.921 | 117.004 | 78.586 | 159.171    | 0.59      |
| car_cr_10  | car     | 10 uM     | 1.898    | 6.85      | 0.03    | 0.229    | 26    | 289.333 | 114.341 | 90.694 | 164.789    | 0.548     |
| car_cr_10  | car     | 10 uM     | 1.515    | 6.25      | 0.011   | 0.133    | 19    | 284.018 | 115.434 | 83.151 | 160.868    | 0.552     |
| car_cr_10  | car     | 10 uM     | 1.759    | 5.03      | 0.016   | 0.124    | 23    | 258.475 | 105.524 | 79.601 | 147.867    | 0.588     |
| car_cr_10  | car     | 10 uM     | 1.781    | 5.38      | 0.031   | 0.201    | 21    | 284.595 | 124.91  | 79.587 | 163.031    | 0.693     |
| car_cr_25  | car     | 25 uM     | 3.588    | 5.33      | 0.019   | 0.165    | 19    | 291.6   | 120.455 | 86.186 | 166.081    | 0.492     |
| car_cr_25  | car     | 25 uM     | 3.285    | 6.19      | 0.024   | 0.148    | 17    | 216.532 | 85.715  | 68.948 | 123.732    | 0.67      |
| car_cr_25  | car     | 25 uM     | 3.169    | 6.73      | 0.011   | 0.182    | 14    | 247.474 | 101.956 | 78.832 | 142.754    | 0.454     |
| car_cr_25  | car     | 25 uM     | 3.347    | 6.08      | 0.036   | 0.213    | 21    | 287.062 | 123.271 | 84.351 | 164.895    | 0.835     |
| car_cr_25  | car     | 25 uM     | 3.419    | 6.41      | 0.027   | 0.155    | 14    | 242.446 | 100.106 | 66.598 | 136.383    | 0.605     |
| car_cr_50  | car     | 50 uM     | 7.991    | 7.65      | 0.023   | 0.117    | 12    | 209.599 | 87.985  | 70.112 | 122.565    | 0.755     |
| car_cr_50  | car     | 50 uM     | 7.349    | 8.33      | 0.012   | 0.128    | 15    | 235.866 | 97.206  | 71.599 | 134.89     | 0.613     |
| car_cr_50  | car     | 50 uM     | 7.289    | 9.29      | 0.026   | 0.184    | 19    | 272.316 | 116.201 | 84.619 | 157.712    | 0.657     |
| car_cr_50  | car     | 50 uM     | 7.543    | 8.42      | 0.017   | 0.189    | 20    | 285.985 | 145.593 | 84.652 | 172.077    | 0.449     |
| car_cr_50  | car     | 50 uM     | 8.068    | 8.64      | 0.018   | 0.129    | 14    | 293.423 | 130.972 | 85.839 | 170.078    | 0.586     |
| car_cr_100 | car     | 100 uM    | 19.475   | 15.58     | 0.001   | 0.043    | 11    | 213.237 | 87.104  | 66.416 | 122.253    | 0.589     |
| car_cr_100 | car     | 100 uM    | 19.674   | 19        | 0.001   | 0.01     | 5     | 275.877 | 108.786 | 74.413 | 153.026    | 0.325     |

|            |     |         |        |       |       |       |    |         |         |        |         |       |
|------------|-----|---------|--------|-------|-------|-------|----|---------|---------|--------|---------|-------|
| car_cr_100 | car | 100 uM  | 20.871 | 14.55 | 0     | 0.021 | 8  | 253.402 | 99.188  | 76.779 | 143.123 | 0.603 |
| car_cr_100 | car | 100 uM  | 20.007 | 13.05 | 0     | 0.015 | 6  | 254.626 | 102.149 | 73.945 | 143.573 | 0.82  |
| car_cr_100 | car | 100 uM  | 21.243 | 13.73 | 0.001 | 0.047 | 4  | 275.986 | 113.516 | 78.172 | 155.892 | 0.547 |
| poa_cr_0   | poa | Control | 0.076  | 1.32  | 0.043 | 0.232 | 9  | 335.442 | 156.865 | 88.658 | 193.655 | 0.355 |
| poa_cr_0   | poa | Control | 0.046  | 1.65  | 0.043 | 0.222 | 13 | 329.883 | 139.312 | 93.585 | 187.593 | 0.32  |
| poa_cr_0   | poa | Control | 0.037  | 2.04  | 0.14  | 0.45  | 15 | 332.379 | 151.525 | 87.784 | 190.563 | 0.545 |
| poa_cr_0   | poa | Control | 0.053  | 1.67  | 0.082 | 0.38  | 14 | 338.428 | 159.711 | 89.535 | 195.891 | 0.463 |
| poa_cr_0   | poa | Control | 0.055  | 1.77  | 0.083 | 0.295 | 11 | 330.837 | 145.201 | 90.047 | 188.695 | 0.449 |
| poa_cr_5   | poa | 5 uM    | 0.41   | 1.41  | 0.16  | 0.558 | 22 | 324.173 | 140.653 | 90.483 | 185.103 | 0.473 |
| poa_cr_5   | poa | 5 uM    | 0.536  | 1.52  | 0.133 | 0.512 | 20 | 313.099 | 130.553 | 90.675 | 178.109 | 0.338 |
| poa_cr_5   | poa | 5 uM    | 0.44   | 2.08  | 0.16  | 0.478 | 17 | 305.569 | 126.295 | 93.143 | 175.003 | 0.428 |
| poa_cr_5   | poa | 5 uM    | 0.462  | 1.67  | 0.226 | 0.769 | 24 | 319.235 | 139.222 | 92.931 | 183.796 | 0.503 |
| poa_cr_5   | poa | 5 uM    | 0.474  | 1.71  | 0.208 | 0.63  | 20 | 303.179 | 116.043 | 86.142 | 168.455 | 0.403 |
| poa_cr_10  | poa | 10 uM   | 1.113  | 2.29  | 0.135 | 0.484 | 24 | 249.667 | 88.449  | 76.841 | 138.319 | 0.303 |
| poa_cr_10  | poa | 10 uM   | 1.207  | 2.76  | 0.196 | 0.685 | 22 | 275.553 | 111.367 | 81.856 | 156.258 | 0.239 |
| poa_cr_10  | poa | 10 uM   | 0.92   | 2.78  | 0.159 | 0.506 | 18 | 273.248 | 96.588  | 79.232 | 149.689 | 0.32  |
| poa_cr_10  | poa | 10 uM   | 1.08   | 2.61  | 0.283 | 0.82  | 27 | 235.013 | 80.324  | 69.543 | 128.294 | 0.331 |
| poa_cr_10  | poa | 10 uM   | 1.144  | 2.73  | 0.267 | 0.928 | 26 | 255.667 | 98.449  | 74.841 | 142.986 | 0.259 |
| poa_cr_25  | poa | 25 uM   | 2.551  | 8.87  | 0.198 | 0.661 | 19 | 210.581 | 66.859  | 63.22  | 113.553 | 0.459 |
| poa_cr_25  | poa | 25 uM   | 2.498  | 10.04 | 0.141 | 0.783 | 22 | 236.321 | 81.883  | 70.862 | 129.689 | 0.36  |
| poa_cr_25  | poa | 25 uM   | 2.225  | 7.41  | 0.267 | 0.941 | 24 | 235.493 | 76.831  | 68.8   | 127.041 | 0.58  |
| poa_cr_25  | poa | 25 uM   | 2.424  | 8.77  | 0.239 | 1.056 | 26 | 249.464 | 81.797  | 73.903 | 135.055 | 0.416 |
| poa_cr_25  | poa | 25 uM   | 2.438  | 9.15  | 0.117 | 0.791 | 19 | 249.747 | 102.047 | 77.525 | 143.106 | 0.454 |
| poa_cr_50  | poa | 50 uM   | 2.853  | 12.16 | 0.123 | 0.553 | 20 | 214.832 | 65.767  | 72.613 | 117.737 | 0.283 |
| poa_cr_50  | poa | 50 uM   | 2.815  | 10.99 | 0.149 | 0.712 | 22 | 205.106 | 64.348  | 62.488 | 110.647 | 0.46  |
| poa_cr_50  | poa | 50 uM   | 2.477  | 12.73 | 0.152 | 0.736 | 22 | 211.762 | 68.145  | 61.246 | 113.718 | 0.394 |
| poa_cr_50  | poa | 50 uM   | 2.715  | 13.3  | 0.203 | 0.959 | 24 | 207.101 | 89.91   | 68.243 | 121.751 | 0.42  |
| poa_cr_50  | poa | 50 uM   | 2.792  | 13.44 | 0.212 | 0.814 | 24 | 211.38  | 91.754  | 69.271 | 124.135 | 0.493 |
| poa_cr_100 | poa | 100 uM  | 10.898 | 12.35 | 0.031 | 0.463 | 13 | 272.963 | 96.988  | 76.044 | 148.665 | 0.23  |
| poa_cr_100 | poa | 100 uM  | 9.956  | 12.73 | 0.013 | 0.405 | 18 | 292.816 | 113.45  | 84.221 | 163.496 | 0.3   |
| poa_cr_100 | poa | 100 uM  | 9.96   | 14.49 | 0.033 | 0.481 | 20 | 317.53  | 138.875 | 84.415 | 180.273 | 0.267 |
| poa_cr_100 | poa | 100 uM  | 10.271 | 12.52 | 0.026 | 0.432 | 11 | 309.83  | 122.168 | 83.183 | 171.727 | 0.434 |
| poa_cr_100 | poa | 100 uM  | 10.696 | 13.16 | 0.043 | 0.284 | 15 | 326.668 | 154.631 | 97.505 | 192.935 | 0.246 |

|            |     |         |        |       |       |       |    |         |         |        |         |       |
|------------|-----|---------|--------|-------|-------|-------|----|---------|---------|--------|---------|-------|
| ste_cr_0   | ste | Control | 0.008  | 0     | 0.163 | 0.984 | 11 | 250.564 | 94.178  | 69.83  | 138.191 | 0.927 |
| ste_cr_0   | ste | Control | 0.008  | 0     | 0.194 | 1.08  | 11 | 220.715 | 81.428  | 57.652 | 119.932 | 1.062 |
| ste_cr_0   | ste | Control | 0.009  | 0     | 0.185 | 1.261 | 12 | 155.727 | 56.158  | 44.876 | 85.587  | 1.261 |
| ste_cr_0   | ste | Control | 0.008  | 0     | 0.371 | 2.742 | 14 | 206.309 | 73.136  | 54.493 | 111.313 | 1.105 |
| ste_cr_0   | ste | Control | 0.009  | 0     | 0.09  | 0.674 | 13 | 267.646 | 105.246 | 73.369 | 148.754 | 0.822 |
| ste_cr_5   | ste | 5 uM    | 0.575  | 0     | 0.354 | 1.608 | 14 | 197.263 | 69.847  | 56.503 | 107.871 | 1.12  |
| ste_cr_5   | ste | 5 uM    | 0.518  | 0     | 0.484 | 2.075 | 14 | 200.646 | 72.234  | 52.293 | 108.391 | 0.865 |
| ste_cr_5   | ste | 5 uM    | 0.506  | 0     | 0.575 | 3.255 | 13 | 174.173 | 60.979  | 46.766 | 93.972  | 1.499 |
| ste_cr_5   | ste | 5 uM    | 0.533  | 0     | 0.446 | 2.983 | 13 | 248.919 | 93.787  | 66.801 | 136.502 | 1.374 |
| ste_cr_5   | ste | 5 uM    | 0.569  | 0     | 0.624 | 3.7   | 15 | 197.196 | 69.116  | 52.05  | 106.12  | 1.297 |
| ste_cr_10  | ste | 10 uM   | 1.166  | 4.05  | 0.837 | 3.692 | 14 | 209.473 | 75.042  | 57.387 | 113.967 | 1.175 |
| ste_cr_10  | ste | 10 uM   | 1.324  | 1.99  | 0.421 | 3.008 | 13 | 144.224 | 53.421  | 38.479 | 78.708  | 0.61  |
| ste_cr_10  | ste | 10 uM   | 1.105  | 2.78  | 0.598 | 2.266 | 13 | 230.037 | 83.152  | 65.375 | 126.188 | 1.107 |
| ste_cr_10  | ste | 10 uM   | 1.198  | 2.94  | 0.457 | 3.924 | 13 | 179.554 | 63.48   | 52.307 | 98.447  | 0.553 |
| ste_cr_10  | ste | 10 uM   | 1.277  | 2.97  | 0.899 | 4.071 | 15 | 186.192 | 61.688  | 57.37  | 101.75  | 1.202 |
| ste_cr_25  | ste | 25 uM   | 2.862  | 10.27 | 0.472 | 1.653 | 13 | 187.661 | 65.387  | 52.079 | 101.709 | 0.907 |
| ste_cr_25  | ste | 25 uM   | 2.745  | 8.67  | 0.573 | 3.383 | 15 | 239.809 | 85.757  | 66.958 | 130.841 | 1.178 |
| ste_cr_25  | ste | 25 uM   | 2.207  | 7.85  | 0.622 | 2.415 | 15 | 184.679 | 65.378  | 52.318 | 100.792 | 1.197 |
| ste_cr_25  | ste | 25 uM   | 2.605  | 8.93  | 0.487 | 1.165 | 13 | 191.943 | 67.391  | 50.437 | 103.257 | 0.988 |
| ste_cr_25  | ste | 25 uM   | 2.687  | 9.39  | 0.567 | 2.879 | 15 | 230.42  | 86.903  | 60.793 | 126.039 | 1.091 |
| ste_cr_50  | ste | 50 uM   | 3.84   | 23.84 | 0.135 | 0.501 | 12 | 239.132 | 81.492  | 70.999 | 130.541 | 0.523 |
| ste_cr_50  | ste | 50 uM   | 3.736  | 24.55 | 0.112 | 0.648 | 12 | 250.711 | 89.668  | 70.847 | 137.075 | 0.548 |
| ste_cr_50  | ste | 50 uM   | 3.893  | 28.01 | 0.137 | 0.715 | 13 | 254.121 | 95.313  | 68.168 | 139.201 | 0.609 |
| ste_cr_50  | ste | 50 uM   | 3.823  | 25.46 | 0.155 | 0.767 | 13 | 227.828 | 78.929  | 66.625 | 124.461 | 0.634 |
| ste_cr_50  | ste | 50 uM   | 3.929  | 25.83 | 0.156 | 0.588 | 12 | 281.761 | 102.937 | 77.594 | 154.097 | 0.445 |
| ste_cr_100 | ste | 100 uM  | 16.925 | 32.98 | 0.004 | 0.004 | 9  | 192.347 | 72.937  | 67.426 | 110.903 | 0.224 |
| ste_cr_100 | ste | 100 uM  | 16.618 | 43.1  | 0.004 | 0.077 | 8  | 262.248 | 103.958 | 75.111 | 147.106 | 0.198 |
| ste_cr_100 | ste | 100 uM  | 15.31  | 37.64 | 0.002 | 0.062 | 8  | 169.846 | 59.054  | 48.191 | 92.364  | 0.255 |
| ste_cr_100 | ste | 100 uM  | 16.284 | 37.91 | 0.002 | 0.043 | 8  | 164.092 | 104.529 | 41.916 | 103.512 | 0.184 |
| ste_cr_100 | ste | 100 uM  | 16.728 | 40.21 | 0.003 | 0.139 | 9  | 263.264 | 94.98   | 75.012 | 144.419 | 0.229 |

**Supplementary Table 3. Complete dataset related to Pb treatments.** Car: *Cardamine hirsuta*; poa: *Poa annua*; ste: *Stellaria media*. Met\_root: Cd concentration in roots (mg/kg DW); met\_shoot: Cd concentration in shoots (mg/kg DW); root\_dw: root dry weight (g) per plant; shoot\_dw: shoot dry weight (g) per plant; nodes: number of nodes per plant; chl\_a: chlorophyll *a* (mg/kg FW); chl\_b: chlorophyll *b* (mg/kg FW); carot: carotenoids (mg/kg FW); photo\_pigm: total photosynthetic pigments (chl\_a + chl\_b + carot) (mg/kg FW); leaf\_area: leaf area (cm<sup>2</sup>). Data are presented in 5 replicates (n=5).

| sample     | species | treatment | met_root | met_shoot | root_dw | shoot_dw | nodes | chl_a   | chl_b   | carot   | photo_pigm | leaf_area |
|------------|---------|-----------|----------|-----------|---------|----------|-------|---------|---------|---------|------------|-----------|
| car_pb_0   | car     | Control   | 0        | 0         | 0.002   | 0.02     | 7     | 416.492 | 150.121 | 112.011 | 226.208    | 2.142     |
| car_pb_0   | car     | Control   | 0        | 0         | 0.01    | 0.083    | 14    | 340.891 | 141.545 | 90.095  | 190.844    | 6.162     |
| car_pb_0   | car     | Control   | 0        | 0         | 0.006   | 0.024    | 6     | 410.373 | 144.956 | 113.342 | 222.89     | 3.29      |
| car_pb_0   | car     | Control   | 0        | 0         | 0.016   | 0.162    | 11    | 309.02  | 137.737 | 84.335  | 177.031    | 2.456     |
| car_pb_0   | car     | Control   | 0        | 0         | 0.01    | 0.053    | 24    | 333.17  | 130.212 | 90.22   | 184.534    | 2.027     |
| car_pb_.5  | car     | 0.5 uM    | 0        | 0         | 0.017   | 0.045    | 13    | 301.647 | 127.212 | 78.358  | 169.072    | 2.644     |
| car_pb_.5  | car     | 0.5 uM    | 0        | 0         | 0.012   | 0.125    | 15    | 299.357 | 111.616 | 81.217  | 164.063    | 6.645     |
| car_pb_.5  | car     | 0.5 uM    | 0        | 0         | 0.028   | 0.261    | 19    | 343.039 | 148.542 | 91.755  | 194.446    | 17.361    |
| car_pb_.5  | car     | 0.5 uM    | 0        | 0         | 0.009   | 0.036    | 10    | 269.01  | 105.547 | 68.019  | 147.525    | 2.798     |
| car_pb_.5  | car     | 0.5 uM    | 0        | 0         | 0.017   | 0.117    | 14    | 303.263 | 123.229 | 79.837  | 168.777    | 7.362     |
| car_pb_1   | car     | 1 uM      | 0.062    | 1.809     | 0.023   | 0.137    | 20    | 270.865 | 111.217 | 72.498  | 151.527    | 6.822     |
| car_pb_1   | car     | 1 uM      | 0.051    | 1.963     | 0.014   | 0.085    | 26    | 259.311 | 109.385 | 70.835  | 146.51     | 2.466     |
| car_pb_1   | car     | 1 uM      | 0.078    | 1.352     | 0.018   | 0.11     | 21    | 294.289 | 117.087 | 78.647  | 163.341    | 4.928     |
| car_pb_1   | car     | 1 uM      | 0.057    | 1.542     | 0.015   | 0.122    | 15    | 298.115 | 112.369 | 82.98   | 164.488    | 10.956    |
| car_pb_1   | car     | 1 uM      | 0.042    | 1.195     | 0.046   | 0.233    | 19    | 231.743 | 106.028 | 57.529  | 131.767    | 8.939     |
| car_pb_5   | car     | 5 uM      | 0.231    | 4.498     | 0.009   | 0.036    | 9     | 270.779 | 97.203  | 70.235  | 146.073    | 2.564     |
| car_pb_5   | car     | 5 uM      | 0.168    | 3.199     | 0.028   | 0.121    | 18    | 315.714 | 127.736 | 86.803  | 176.751    | 6.253     |
| car_pb_5   | car     | 5 uM      | 0.185    | 4.226     | 0.024   | 0.129    | 21    | 260.811 | 98.69   | 68.572  | 142.691    | 6.567     |
| car_pb_5   | car     | 5 uM      | 0.199    | 3.737     | 0.015   | 0.079    | 16    | 312.445 | 123.411 | 87.139  | 174.332    | 4.593     |
| car_pb_5   | car     | 5 uM      | 0.166    | 4.005     | 0.01    | 0.091    | 10    | 325.355 | 135.961 | 85.64   | 182.319    | 5.036     |
| car_pb_7.5 | car     | 7.5 uM    | 0.218    | 6.073     | 0.023   | 0.087    | 23    | 302.196 | 114.414 | 85.46   | 167.357    | 11.155    |
| car_pb_7.5 | car     | 7.5 uM    | 0.261    | 6.039     | 0.011   | 0.082    | 21    | 276.596 | 107.705 | 78.037  | 154.113    | 2.62      |
| car_pb_7.5 | car     | 7.5 uM    | 0.187    | 5.763     | 0.015   | 0.069    | 12    | 256.402 | 96.26   | 67.4    | 140.021    | 3.66      |
| car_pb_7.5 | car     | 7.5 uM    | 0.237    | 6.518     | 0.008   | 0.031    | 8     | 281.037 | 75.989  | 109.017 | 155.348    | 3.499     |
| car_pb_7.5 | car     | 7.5 uM    | 0.262    | 6.042     | 0.008   | 0.025    | 9     | 346.959 | 158.284 | 93.703  | 199.648    | 3.351     |
| car_pb_15  | car     | 15 uM     | 0.412    | 5.527     | 0.038   | 0.091    | 17    | 335.329 | 134.012 | 95.637  | 188.326    | 3.937     |

|            |     |         |        |       |       |       |    |         |         |         |         |       |
|------------|-----|---------|--------|-------|-------|-------|----|---------|---------|---------|---------|-------|
| car_pb_15  | car | 15 uM   | 0.504  | 6.066 | 0.011 | 0.074 | 14 | 264.041 | 97.964  | 73.044  | 145.016 | 4.987 |
| car_pb_15  | car | 15 uM   | 0.424  | 4.963 | 0.005 | 0.015 | 6  | 376.521 | 131.587 | 102.234 | 203.447 | 1.3   |
| car_pb_15  | car | 15 uM   | 0.623  | 5.534 | 0.011 | 0.093 | 14 | 207.176 | 80.566  | 58.54   | 115.427 | 2.252 |
| car_pb_15  | car | 15 uM   | 0.553  | 5.293 | 0.027 | 0.235 | 19 | 290.545 | 110.947 | 79.885  | 160.459 | 8.86  |
| poa_pb_0   | poa | Control | 0      | 0     | 0.005 | 0.037 | 5  | 343.232 | 197.503 | 91.577  | 210.771 | 3.709 |
| poa_pb_0   | poa | Control | 0      | 0     | 0.015 | 0.048 | 3  | 376.97  | 173.2   | 103.868 | 218.013 | 3.674 |
| poa_pb_0   | poa | Control | 0      | 0     | 0.016 | 0.042 | 4  | 335.366 | 137.959 | 92.577  | 188.634 | 3.114 |
| poa_pb_0   | poa | Control | 0      | 0     | 0.01  | 0.035 | 3  | 369.37  | 171.229 | 100.1   | 213.566 | 2.796 |
| poa_pb_0   | poa | Control | 0      | 0     | 0.017 | 0.058 | 3  | 374.91  | 180.001 | 102.308 | 219.073 | 3.483 |
| poa_pb_.5  | poa | 0.5 uM  | 0.435  | 0     | 0.022 | 0.088 | 5  | 64.657  | 369.246 | 71.207  | 168.37  | 4.53  |
| poa_pb_.5  | poa | 0.5 uM  | 1.183  | 0     | 0.02  | 0.1   | 7  | 341.588 | 190.98  | 90.891  | 207.82  | 4.366 |
| poa_pb_.5  | poa | 0.5 uM  | 1.163  | 0     | 0.029 | 0.112 | 6  | 393.793 | 215.683 | 108.856 | 239.444 | 3.605 |
| poa_pb_.5  | poa | 0.5 uM  | 1.91   | 0     | 0.043 | 0.13  | 7  | 316.515 | 193.074 | 81.886  | 197.159 | 3.92  |
| poa_pb_.5  | poa | 0.5 uM  | 0.276  | 0     | 0.033 | 0.113 | 7  | 348.983 | 152.749 | 96.678  | 199.47  | 3.906 |
| poa_pb_1   | poa | 1 uM    | 3.052  | 0     | 0.024 | 0.106 | 8  | 370.442 | 188.227 | 97.791  | 218.82  | 3.593 |
| poa_pb_1   | poa | 1 uM    | 2.303  | 0     | 0.025 | 0.107 | 6  | 334.119 | 147.885 | 93.328  | 191.777 | 5.023 |
| poa_pb_1   | poa | 1 uM    | 2.269  | 0     | 0.065 | 0.218 | 10 | 333.319 | 130.506 | 100.717 | 188.181 | 4.632 |
| poa_pb_1   | poa | 1 uM    | 3.041  | 0     | 0.079 | 0.156 | 10 | 341.744 | 238.418 | 65.737  | 215.3   | 3.537 |
| poa_pb_1   | poa | 1 uM    | 1.815  | 0     | 0.056 | 0.238 | 10 | 180.736 | 180.736 | 96.815  | 152.762 | 4.408 |
| poa_pb_5   | poa | 5 uM    | 4.709  | 0.21  | 0.031 | 0.132 | 6  | 341.766 | 178.049 | 81.957  | 200.591 | 5.418 |
| poa_pb_5   | poa | 5 uM    | 4.072  | 0.19  | 0.017 | 0.071 | 5  | 396.391 | 181.609 | 111.805 | 229.935 | 2.73  |
| poa_pb_5   | poa | 5 uM    | 5.255  | 0.205 | 0.022 | 0.187 | 8  | 369.233 | 168.69  | 104.697 | 214.207 | 5.324 |
| poa_pb_5   | poa | 5 uM    | 4.458  | 0.187 | 0.044 | 0.171 | 8  | 357.652 | 139.246 | 98.78   | 198.559 | 4.59  |
| poa_pb_5   | poa | 5 uM    | 4.107  | 0.238 | 0.035 | 0.121 | 8  | 330.646 | 176.184 | 90.767  | 199.199 | 3.79  |
| poa_pb_7.5 | poa | 7.5 uM  | 9.544  | 0.413 | 0.041 | 0.182 | 7  | 166.354 | 157.994 | 52.489  | 125.612 | 4.903 |
| poa_pb_7.5 | poa | 7.5 uM  | 6.214  | 0.465 | 0.069 | 0.24  | 8  | 338.801 | 149.138 | 100     | 195.98  | 5.78  |
| poa_pb_7.5 | poa | 7.5 uM  | 8.239  | 0.583 | 0.053 | 0.191 | 10 | 367.549 | 151.878 | 101.767 | 207.065 | 5.077 |
| poa_pb_7.5 | poa | 7.5 uM  | 6.274  | 0.647 | 0.08  | 0.263 | 10 | 221.157 | 69.96   | 137.032 | 142.716 | 4.341 |
| poa_pb_7.5 | poa | 7.5 uM  | 7.463  | 0.595 | 0.069 | 0.249 | 10 | 265.636 | 92.671  | 77.662  | 145.323 | 4.547 |
| poa_pb_15  | poa | 15 uM   | 17.042 | 1.08  | 0.052 | 0.193 | 8  | 25.16   | 8.321   | 7.909   | 13.797  | 6.099 |
| poa_pb_15  | poa | 15 uM   | 15.899 | 1.385 | 0.067 | 0.228 | 9  | 282.4   | 109.176 | 82.073  | 157.883 | 5.816 |
| poa_pb_15  | poa | 15 uM   | 14.302 | 1.411 | 0.049 | 0.239 | 10 | 233.339 | 79.043  | 69.069  | 127.15  | 5.502 |



|            |     |         |        |       |       |       |    |         |         |        |         |       |
|------------|-----|---------|--------|-------|-------|-------|----|---------|---------|--------|---------|-------|
| poa_pb_15  | poa | 15 uM   | 18.344 | 1.077 | 0.078 | 0.254 | 10 | 232.406 | 78.27   | 65.807 | 125.494 | 4.305 |
| poa_pb_15  | poa | 15 uM   | 12.6   | 1.41  | 0.06  | 0.243 | 9  | 232.305 | 76.577  | 69.847 | 126.243 | 4.067 |
| ste_pb_0   | ste | Control | 0      | 0     | 0.047 | 0.347 | 10 | 202.878 | 79.144  | 55.166 | 112.396 | 3.438 |
| ste_pb_0   | ste | Control | 0      | 0     | 0.033 | 0.247 | 10 | 269.245 | 101.122 | 78.736 | 149.701 | 3.8   |
| ste_pb_0   | ste | Control | 0      | 0     | 0.15  | 0.698 | 10 | 227.469 | 82.069  | 66.316 | 125.284 | 7.211 |
| ste_pb_0   | ste | Control | 0      | 0     | 0.13  | 0.704 | 10 | 160.157 | 55.273  | 43.215 | 86.215  | 5.455 |
| ste_pb_0   | ste | Control | 0      | 0     | 0.194 | 0.922 | 10 | 207.961 | 77.887  | 56.425 | 114.091 | 5.605 |
| ste_pb_.5  | ste | 0.5 uM  | 0      | 0.054 | 0.112 | 0.51  | 9  | 163.367 | 55.205  | 43.472 | 87.348  | 5.698 |
| ste_pb_.5  | ste | 0.5 uM  | 0      | 0.062 | 0.318 | 0.686 | 10 | 210.168 | 76.878  | 56.882 | 114.643 | 5.096 |
| ste_pb_.5  | ste | 0.5 uM  | 0      | 0.082 | 0.127 | 0.86  | 10 | 186.304 | 66.357  | 51.598 | 101.419 | 6.347 |
| ste_pb_.5  | ste | 0.5 uM  | 0      | 0.07  | 0.218 | 1.1   | 10 | 195.613 | 71.694  | 55.083 | 107.463 | 5.531 |
| ste_pb_.5  | ste | 0.5 uM  | 0      | 0.07  | 0.299 | 1.261 | 11 | 183.757 | 60.883  | 50.121 | 98.254  | 6.364 |
| ste_pb_1   | ste | 1 uM    | 0.154  | 0.822 | 0.102 | 0.275 | 11 | 219.667 | 79.575  | 58.797 | 119.346 | 5.824 |
| ste_pb_1   | ste | 1 uM    | 0.071  | 0.79  | 0.046 | 0.416 | 11 | 178.284 | 68.282  | 47.037 | 97.868  | 5.387 |
| ste_pb_1   | ste | 1 uM    | 0.218  | 0.118 | 0.276 | 0.941 | 9  | 200.341 | 70.161  | 55.052 | 108.518 | 7.313 |
| ste_pb_1   | ste | 1 uM    | 0.189  | 0.97  | 0.23  | 0.996 | 10 | 219.508 | 76.943  | 56.464 | 117.638 | 6.115 |
| ste_pb_1   | ste | 1 uM    | 0.201  | 0.684 | 0.221 | 0.972 | 10 | 197.297 | 64.955  | 58.512 | 106.921 | 4.549 |
| ste_pb_5   | ste | 5 uM    | 3.417  | 2.288 | 0.134 | 0.975 | 11 | 231.488 | 80.188  | 62.115 | 124.597 | 6.176 |
| ste_pb_5   | ste | 5 uM    | 3.122  | 3.001 | 0.281 | 1.1   | 10 | 208.671 | 72.714  | 57.862 | 113.082 | 6.904 |
| ste_pb_5   | ste | 5 uM    | 2.922  | 1.896 | 0.109 | 0.809 | 10 | 159.291 | 56.524  | 44.779 | 86.865  | 5.322 |
| ste_pb_5   | ste | 5 uM    | 3.685  | 2.972 | 0.26  | 1.332 | 10 | 155.78  | 54.747  | 44.343 | 84.957  | 7.858 |
| ste_pb_5   | ste | 5 uM    | 2.943  | 2.193 | 0.164 | 1.053 | 10 | 177.733 | 61.42   | 45.658 | 94.937  | 4.883 |
| ste_pb_7.5 | ste | 7.5 uM  | 5.122  | 4.333 | 0.18  | 1.135 | 11 | 171.903 | 60.614  | 49.754 | 94.09   | 6.827 |
| ste_pb_7.5 | ste | 7.5 uM  | 5.443  | 3.758 | 0.226 | 1.172 | 10 | 183.325 | 66.592  | 52.069 | 100.662 | 6.155 |
| ste_pb_7.5 | ste | 7.5 uM  | 4.946  | 4.557 | 0.395 | 1.715 | 11 | 204.235 | 130.986 | 48.805 | 128.008 | 7.967 |
| ste_pb_7.5 | ste | 7.5 uM  | 5.257  | 3.868 | 0.116 | 0.567 | 10 | 193.73  | 71.503  | 54.619 | 106.617 | 5.432 |
| ste_pb_7.5 | ste | 7.5 uM  | 4.769  | 4.361 | 0.302 | 1.971 | 11 | 216.354 | 75.154  | 58.001 | 116.503 | 5.042 |
| ste_pb_15  | ste | 15 uM   | 6.169  | 4.593 | 0.136 | 0.678 | 10 | 204.895 | 73.407  | 56.977 | 111.76  | 4.304 |
| ste_pb_15  | ste | 15 uM   | 6.982  | 4.802 | 0.2   | 1.117 | 11 | 172.859 | 58.886  | 46.503 | 92.749  | 5.971 |
| ste_pb_15  | ste | 15 uM   | 7.158  | 4.517 | 0.252 | 1.535 | 11 | 197.071 | 65.326  | 58.843 | 107.08  | 6.076 |
| ste_pb_15  | ste | 15 uM   | 7.109  | 5.602 | 0.21  | 1.328 | 10 | 197.799 | 71.632  | 51.572 | 107.001 | 7.685 |
| ste_pb_15  | ste | 15 uM   | 6.557  | 4.938 | 0.233 | 1.604 | 11 | 206.051 | 69.759  | 57.429 | 111.079 | 5.416 |

**Supplementary Table 4. One-way ANOVA statistical analysis output related to data presented for Cd, Cr and Pb treatments.** DF, degrees of freedom, SS, sum of squares, MS, mean of squares. Significance codes: (\*\*\*),  $p \leq 0.001$ ; (\*\*),  $p \leq 0.01$ ; (\*),  $p \leq 0.05$ .

| <b>Cadmium treatment (Table 1, Fig.2, Supplementary Table S1)</b>   |                              |           |           |           |           |                |                |
|---------------------------------------------------------------------|------------------------------|-----------|-----------|-----------|-----------|----------------|----------------|
| <b>Species</b>                                                      | <b>Parameter</b>             |           | <b>DF</b> | <b>SS</b> | <b>MS</b> | <b>F value</b> | <b>P value</b> |
| <i>C. hirsuta</i>                                                   | Metal root (mg/kg DW)        | Sample    | 5         | 0.009859  | 0.001972  | 103.7          | 1.92e-15 ***   |
|                                                                     |                              | Residuals | 24        | 0.000456  | 0.000019  |                |                |
| <i>C. hirsuta</i>                                                   | Metal shoot (mg/kg DW)       | Sample    | 5         | 153.44    | 30.688    | 394.3          | <2e-16 ***     |
|                                                                     |                              | Residuals | 24        | 1.87      | 0.078     |                |                |
| <i>C. hirsuta</i>                                                   | Root DW (g/plant)            | Sample    | 5         | 0.0120    | 0.0024    | 33.12          | 5.09e-10 ***   |
|                                                                     |                              | Residuals | 24        | 0.0018    | 0.0007    |                |                |
| <i>C. hirsuta</i>                                                   | Shoot DW (g/plant)           | Sample    | 5         | 1.7233    | 0.3447    | 33.61          | 4.37e-10 ***   |
|                                                                     |                              | Residuals | 24        | 0.2461    | 0.0103    |                |                |
| <i>C. hirsuta</i>                                                   | Number of nodes/plant        | Sample    | 5         | 1864.2    | 372.8     | 21.26          | 4.17e-08 ***   |
|                                                                     |                              | Residuals | 24        | 420.8     | 17.5      |                |                |
| <i>C. hirsuta</i>                                                   | Leaf area (cm <sup>2</sup> ) | Sample    | 5         | 123.1     | 24.617    | 3.371          | 0.019 *        |
|                                                                     |                              | Residuals | 24        | 175.3     | 7.303     |                |                |
| <i>C. hirsuta</i>                                                   | Photo. pigm. (mg/kg FW)      | Sample    | 5         | 1724      | 344.9     | 2.919          | 0.0338 *       |
|                                                                     |                              | Residuals | 24        | 2835      | 118.1     |                |                |
| <i>P. annua</i>                                                     | Metal root (mg/kg DW)        | Sample    | 5         | 1230.8    | 246.16    | 458            | <2e-16 ***     |
|                                                                     |                              | Residuals | 24        | 12.9      | 0.54      |                |                |
| <i>P. annua</i>                                                     | Metal shoot (mg/kg DW)       | Sample    | 5         | 681.2     | 136.24    | 511.5          | <2e-16 ***     |
|                                                                     |                              | Residuals | 24        | 6.4       | 0.27      |                |                |
| <i>P. annua</i>                                                     | Root DW (g/plant)            | Sample    | 5         | 0.029416  | 0.005883  | 20.79          | 5.17e-08 ***   |
|                                                                     |                              | Residuals | 24        | 0.006791  | 0.0003    |                |                |
| <i>P. annua</i>                                                     | Shoot DW (g/plant)           | Sample    | 5         | 1.6251    | 0.3250    | 13.25          | 2.98e-06 ***   |
|                                                                     |                              | Residuals | 24        | 0.5888    | 0.0245    |                |                |
| <i>P. annua</i>                                                     | Number of nodes/plant        | Sample    | 5         | 1173      | 234.59    | 30.27          | 1.28e-09 ***   |
|                                                                     |                              | Residuals | 24        | 186       | 7.75      |                |                |
| <i>P. annua</i>                                                     | Leaf area (cm <sup>2</sup> ) | Sample    | 5         | 14.80     | 2.960     | 2.801          | 0.0395*        |
|                                                                     |                              | Residuals | 24        | 25.36     | 1.057     |                |                |
| <i>P. annua</i>                                                     | Photo. pigm. (mg/kg FW)      | Sample    | 5         | 5717      | 1143.4    | 10.23          | 2.42e-05***    |
|                                                                     |                              | Residuals | 24        | 2683      | 111.8     |                |                |
| <i>S. media</i>                                                     | Metal root (mg/kg DW)        | Sample    | 5         | 22324     | 4465      | 408.4          | <2e-16 ***     |
|                                                                     |                              | Residuals | 24        | 262       | 11        |                |                |
| <i>S. media</i>                                                     | Metal shoot (mg/kg DW)       | Sample    | 5         | 79.59     | 15.919    | 224.6          | <2e-16 ***     |
|                                                                     |                              | Residuals | 24        | 1.7       | 0.071     |                |                |
| <i>S. media</i>                                                     | Root DW (g/plant)            | Sample    | 5         | 0.04445   | 0.008889  | 22.98          | 1.98e-08 ***   |
|                                                                     |                              | Residuals | 24        | 0.00928   | 0.000387  |                |                |
| <i>S. media</i>                                                     | Shoot DW (g/plant)           | Sample    | 5         | 2.184     | 0.4368    | 1.678          | 0.178          |
|                                                                     |                              | Residuals | 24        | 6.248     | 0.2603    |                |                |
| <i>S. media</i>                                                     | Number of nodes/plant        | Sample    | 5         | 5.9       | 1.180     | 1.057          | 0.408          |
|                                                                     |                              | Residuals | 24        | 26.8      | 1.117     |                |                |
| <i>S. media</i>                                                     | Leaf area (cm <sup>2</sup> ) | Sample    | 5         | 15.52     | 3.105     | 2.107          | 0.0995         |
|                                                                     |                              | Residuals | 24        | 35.36     | 1.473     |                |                |
| <i>S. media</i>                                                     | Photo. pigm. (mg/kg FW)      | Sample    | 5         | 2524      | 504.9     | 2.713          | 0.0443 *       |
|                                                                     |                              | Residuals | 24        | 4466      | 186.1     |                |                |
| <b>Chromium Treatment (Table 1, Fig. 3, Supplementary Table S2)</b> |                              |           |           |           |           |                |                |
| <b>Species</b>                                                      | <b>Parameter</b>             |           | <b>DF</b> | <b>SS</b> | <b>MS</b> | <b>F value</b> | <b>P value</b> |

|                   |                                 |           |    |           |          |       |              |
|-------------------|---------------------------------|-----------|----|-----------|----------|-------|--------------|
| <i>C. hirsuta</i> | Metal root<br>(mg/kg DW)        | Sample    | 5  | 1464.2    | 292.83   | 2262  | <2e-16 ***   |
|                   |                                 | Residuals | 24 | 3.1       | 0.13     |       |              |
| <i>C. hirsuta</i> | Metal shoot<br>(mg/kg DW)       | Sample    | 5  | 469.7     | 93.94    | 56.66 | 1.67e-12 *** |
|                   |                                 | Residuals | 24 | 39.8      | 1.66     |       |              |
| <i>C. hirsuta</i> | Root DW<br>(g/plant)            | Sample    | 5  | 0.0026831 | 0.000536 | 16    | 5.78e-07 *** |
|                   |                                 | Residuals | 24 | 0.0008049 | 0.000034 |       |              |
| <i>C. hirsuta</i> | Shoot DW<br>(g/plant)           | Sample    | 5  | 0.10683   | 0.021366 | 20.84 | 5.06e-08 *** |
|                   |                                 | Residuals | 24 | 0.02461   | 0.001025 |       |              |
| <i>C. hirsuta</i> | Number of<br>nodes/plant        | Sample    | 5  | 814.7     | 162.94   | 14.7  | 1.22e-06 *** |
|                   |                                 | Residuals | 24 | 266.0     | 11.08    |       |              |
| <i>C. hirsuta</i> | Leaf area<br>(cm <sup>2</sup> ) | Sample    | 5  | 0.1408    | 0.02817  | 1.062 | 0.406        |
|                   |                                 | Residuals | 24 | 0.6368    | 0.02653  |       |              |
| <i>C. hirsuta</i> | Photo. pigm.<br>(mg/kg FW)      | Sample    | 5  | 2641      | 528.3    | 1.863 | 0.139        |
|                   |                                 | Residuals | 24 | 6807      | 283.6    |       |              |
| <i>P. annua</i>   | Metal root<br>(mg/kg DW)        | Sample    | 5  | 365.7     | 73.14    | 1866  | <2e-16 ***   |
|                   |                                 | Residuals | 24 | 0.9       | 0.04     |       |              |
| <i>P. annua</i>   | Metal shoot<br>(mg/kg DW)       | Sample    | 5  | 728.5     | 145.7    | 312   | <2e-16 ***   |
|                   |                                 | Residuals | 24 | 11.2      | 0.47     |       |              |
| <i>P. annua</i>   | Root DW<br>(g/plant)            | Sample    | 5  | 0.12805   | 0.025609 | 11.92 | 7.17e-06 *** |
|                   |                                 | Residuals | 24 | 0.05157   | 0.002149 |       |              |
| <i>P. annua</i>   | Shoot DW<br>(g/plant)           | Sample    | 5  | 1.038     | 0.20768  | 11.12 | 1.25e-05 *** |
|                   |                                 | Residuals | 24 | 0.448     | 0.01867  |       |              |
| <i>P. annua</i>   | Number of<br>nodes/plant        | Sample    | 5  | 491       | 98.19    | 11.55 | 9.24e-06 *** |
|                   |                                 | Residuals | 24 | 204       | 8.50     |       |              |
| <i>P. annua</i>   | Leaf area<br>(cm <sup>2</sup> ) | Sample    | 5  | 0.1299    | 0.025982 | 4.659 | 0.0041 **    |
|                   |                                 | Residuals | 24 | 0.1338    | 0.005576 |       |              |
| <i>P. annua</i>   | Photo. pigm.<br>(mg/kg FW)      | Sample    | 5  | 21499     | 4300     | 42.78 | 3.48e-11 *** |
|                   |                                 | Residuals | 24 | 2412      | 100      |       |              |
| <i>S. media</i>   | Metal root<br>(mg/kg DW)        | Sample    | 5  | 953.1     | 190.62   | 2365  | <2e-16 ***   |
|                   |                                 | Residuals | 24 | 1.9       | 0.08     |       |              |
| <i>S. media</i>   | Metal shoot<br>(mg/kg DW)       | Sample    | 5  | 6274      | 1255     | 424.3 | <2e-16 ***   |
|                   |                                 | Residuals | 24 | 71        | 3        |       |              |
| <i>S. media</i>   | Root DW<br>(g/plant)            | Sample    | 5  | 1.6551    | 0.3310   | 26.96 | 4.11e-09 *** |
|                   |                                 | Residuals | 24 | 0.2947    | 0.0123   |       |              |
| <i>S. media</i>   | Shoot DW<br>(g/plant)           | Sample    | 5  | 40.86     | 8.172    | 17.65 | 2.38e-07 *** |
|                   |                                 | Residuals | 24 | 11.11     | 0.463    |       |              |
| <i>S. media</i>   | Number of<br>nodes/plant        | Sample    | 5  | 113.4     | 22.673   | 27.21 | 3.75e-09 *** |
|                   |                                 | Residuals | 24 | 20.0      | 0.833    |       |              |
| <i>S. media</i>   | Leaf area<br>(cm <sup>2</sup> ) | Sample    | 5  | 8465      | 658.5    | 1.867 | 0.138        |
|                   |                                 | Residuals | 24 | 3292      | 352.7    |       |              |
| <i>S. media</i>   | Photo. pigm.<br>(mg/kg FW)      | Sample    | 5  | 3.615     | 0.7229   | 20.33 | 6.39e-08 *** |
|                   |                                 | Residuals | 24 | 0.853     | 0.0356   |       |              |

#### Lead treatment (Table 1, Fig. 4, Supplementary Table S3)

| Species           | Parameter                 |           | DF | SS        | MS       | F value | P value      |
|-------------------|---------------------------|-----------|----|-----------|----------|---------|--------------|
| <i>C. hirsuta</i> | Metal root<br>(mg/kg DW)  | Sample    | 5  | 0.9276    | 0.18551  | 114.2   | 6.33e-16 *** |
|                   |                           | Residuals | 24 | 0.039     | 0.00162  |         |              |
| <i>C. hirsuta</i> | Metal shoot<br>(mg/kg DW) | Sample    | 5  | 182.14    | 36.43    | 374.6   | <2e-16 ***   |
|                   |                           | Residuals | 24 | 2.33      | 0.10     |         |              |
| <i>C. hirsuta</i> | Root DW<br>(g/plant)      | Sample    | 5  | 0.0003540 | 7.07e-05 | 1.747   | 0.162        |
|                   |                           | Residuals | 24 | 0.0009726 | 4.05e-05 |         |              |

|                   |                              |           |    |          |          |       |              |
|-------------------|------------------------------|-----------|----|----------|----------|-------|--------------|
| <i>C. hirsuta</i> | Shoot DW (g/plant)           | Sample    | 5  | 0.01224  | 0.002448 | 1.975 | 0.119        |
|                   |                              | Residuals | 24 | 0.02974  | 0.001239 |       |              |
| <i>C. hirsuta</i> | Number of nodes/plant        | Sample    | 5  | 26.2     | 5.233    | 0.18  | 0.968        |
|                   |                              | Residuals | 24 | 699.2    | 29.133   |       |              |
| <i>C. hirsuta</i> | Leaf area (cm <sup>2</sup> ) | Sample    | 5  | 61.27    | 12.25    | 0.999 | 0.44         |
|                   |                              | Residuals | 24 | 294.47   | 12.27    |       |              |
| <i>C. hirsuta</i> | Photo. pigm. (mg/kg FW)      | Sample    | 5  | 6893     | 1379     | 2.714 | 0.0542       |
|                   |                              | Residuals | 24 | 12193    | 508      |       |              |
| <i>P. annua</i>   | Metal root (mg/kg DW)        | Sample    | 5  | 834.8    | 166.96   | 124.9 | 2.28e-16 *** |
|                   |                              | Residuals | 24 | 32.1     | 1.34     |       |              |
| <i>P. annua</i>   | Metal shoot (mg/kg DW)       | Sample    | 5  | 6.373    | 1.2747   | 184.6 | <2e-16 ***   |
|                   |                              | Residuals | 24 | 0.166    | 0.0069   |       |              |
| <i>P. annua</i>   | Root DW (g/plant)            | Sample    | 5  | 0.010143 | 0.002028 | 10.18 | 2.51e-05 *** |
|                   |                              | Residuals | 24 | 0.004783 | 0.000199 |       |              |
| <i>P. annua</i>   | Shoot DW (g/plant)           | Sample    | 5  | 0.12816  | 0.025632 | 19.23 | 1.08e-07 *** |
|                   |                              | Residuals | 24 | 0.03199  | 0.001333 |       |              |
| <i>P. annua</i>   | Number of nodes/plant        | Sample    | 5  | 116.7    | 23.333   | 14.74 | 1.19e-06 *** |
|                   |                              | Residuals | 24 | 38.0     | 1.583    |       |              |
| <i>P. annua</i>   | Leaf area (cm <sup>2</sup> ) | Sample    | 5  | 10.36    | 2.0719   | 3.958 | 0.00927 **   |
|                   |                              | Residuals | 24 | 12.56    | 0.5234   |       |              |
| <i>P. annua</i>   | Photo. pigm. (mg/kg FW)      | Sample    | 5  | 37736    | 7547     | 7.468 | 0.000239 *** |
|                   |                              | Residuals | 24 | 24255    | 1011     |       |              |
| <i>S. media</i>   | Metal root (mg/kg DW)        | Sample    | 5  | 218.46   | 43.69    | 731.5 | <2e-16 ***   |
|                   |                              | Residuals | 24 | 1.43     | 0.06     |       |              |
| <i>S. media</i>   | Metal shoot (mg/kg DW)       | Sample    | 5  | 113.9    | 22.78    | 208.4 | <2e-16 ***   |
|                   |                              | Residuals | 24 | 2.62     | 0.109    |       |              |
| <i>S. media</i>   | Root DW (g/plant)            | Sample    | 5  | 0.05131  | 0.010261 | 1.446 | 0.244        |
|                   |                              | Residuals | 24 | 0.17033  | 0.007097 |       |              |
| <i>S. media</i>   | Shoot DW (g/plant)           | Sample    | 5  | 2.114    | 0.4228   | 3.311 | 0.0205 *     |
|                   |                              | Residuals | 24 | 3.065    | 0.1277   |       |              |
| <i>S. media</i>   | Number of nodes/plant        | Sample    | 5  | 1.867    | 0.3733   | 1.12  | 0.376        |
|                   |                              | Residuals | 24 | 8.000    | 0.3333   |       |              |
| <i>S. media</i>   | Leaf area (cm <sup>2</sup> ) | Sample    | 5  | 4.48     | 0.8952   | 0.676 | 0.645        |
|                   |                              | Residuals | 24 | 31.76    | 1.3235   |       |              |
| <i>S. media</i>   | Photo. pigm. (mg/kg FW)      | Sample    | 5  | 942      | 188.5    | 0.907 | 0.493        |
|                   |                              | Residuals | 24 | 4985     | 207.7    |       |              |
